# Supplementary material for: Genomic Regions and Candidate Genes Affecting Response to Heat Stress with Newcastle Virus Infection in Commercial Layer Chicks Using Chicken 600K Single Nucleotide Polymorphism Array
Source: MDPI journal article supplement (doi:10.3390/ijms25052640), 2024-02-24
Supplement: s1 [file s1]

**Table S1. Least square means and *P*-values of blood parameters with treatments.**

|                         |                            | LS Mean $\pm$ SE               |                                |        | P-values |         |
|-------------------------|----------------------------|--------------------------------|--------------------------------|--------|----------|---------|
|                         | Blood Parameter            | Control                        | Treated                        | Trt    | Sex      | Trt*Sex |
| Acute Heat (AH)         | Na <sup>+</sup> (mmol/L)   | 129.62 $\pm$ 0.91              | 129.44 $\pm$ 0.27              | 0.6205 | 0.9369   | 0.1287  |
|                         | K <sup>+</sup> (mmol/L)    | 4.32 $\pm$ 0.07                | 4.29 $\pm$ 0.02                | 0.7719 | 0.2594   | 0.13    |
|                         | iCa <sup>2+</sup> (mmol/L) | 0.45 $\pm$ 0.07                | 0.76 $\pm$ 0.03                | 0.5531 | 0.7541   | 0.339   |
|                         | Glu (mg/dL)                | 241.72 $\pm$ 3.00              | 249.94 $\pm$ 0.94              | 0.3633 | 0.6815   | 0.1691  |
|                         | pH                         | 7.46 $\pm$ 0.009               | 7.42 $\pm$ 0.003               | 0.1533 | 0.2874   | 0.9615  |
|                         | PCO <sub>2</sub> (mmHg)    | 30.98 $\pm$ 0.76               | 32.63 $\pm$ 0.24               | 0.323  | 0.6564   | 0.6222  |
|                         | TCO <sub>2</sub> (mmol/L)  | 23.42 $\pm$ 0.30               | 22.08 $\pm$ 0.09               | 0.3774 | 0.9779   | 0.5105  |
|                         | HCO <sub>3</sub> (mmol/L)  | 22.51 $\pm$ 0.29               | 21.09 $\pm$ 0.09               | 0.3765 | 0.8204   | 0.5843  |
|                         | PO <sub>2</sub> (mmHg)     | 61.38 $\pm$ 1.38               | 55.37 $\pm$ 1.24               | 0.1144 | 0.8326   | 0.964   |
|                         | sO <sub>2</sub> (%)        | 92.45 $\pm$ 0.82               | 86.74 $\pm$ 0.26               | 0.113  | 0.4692   | 0.3884  |
|                         | BE (mmol/L)                | -1.23 $\pm$ 0.35               | -3.35 $\pm$ 0.11               | 0.3846 | 0.5564   | 0.4883  |
| Chronic Heat (CH)       | Na <sup>+</sup> (mmol/L)   | 129.99 $\pm$ 0.84              | 129.55 $\pm$ 0.23              | 0.8913 | 0.0463   | 0.1875  |
|                         | K <sup>+</sup> (mmol/L)    | 4.29 $\pm$ 0.08                | 4.28 $\pm$ 0.02                | 0.9095 | 0.8872   | 0.4046  |
|                         | iCa <sup>2+</sup> (mmol/L) | 0.87 $\pm$ 0.03                | 0.84 $\pm$ 0.01                | 0.5378 | 0.0702   | 0.308   |
|                         | Glu (mg/dL)                | 240.50 $\pm$ 3.57              | 239.63 $\pm$ 0.95              | 0.7872 | 0.7735   | 0.5109  |
|                         | pH                         | 7.42 $\pm$ 0.01                | 7.41 $\pm$ 0.01                | 0.3451 | 0.3216   | 0.6793  |
|                         | PCO <sub>2</sub> (mmHg)    | 32.49 $\pm$ 0.38               | 30.79 $\pm$ 0.24               | 0.4781 | 0.3671   | 0.3865  |
|                         | TCO <sub>2</sub> (mmol/L)  | 22.03 $\pm$ 0.38               | 20.33 $\pm$ 0.10               | 0.3635 | 0.4069   | 0.1356  |
|                         | HCO <sub>3</sub> (mmol/L)  | 21.07 $\pm$ 0.36               | 19.41 $\pm$ 0.10               | 0.3462 | 0.4269   | 0.1494  |
|                         | PO <sub>2</sub> (mmHg)     | 60.80 $\pm$ 1.32               | 57.83 $\pm$ 0.35               | 0.3025 | 0.4143   | 0.1295  |
|                         | sO <sub>2</sub> (%)        | 91.12 $\pm$ 0.72               | 89.31 $\pm$ 0.19               | 0.2322 | 0.5876   | 0.165   |
|                         | BE (mmol/L)                | -3.33 $\pm$ 0.42 <sup>A</sup>  | -5.20 $\pm$ 0.11 <sup>B</sup>  | 0.0005 | 0.8871   | 0.8147  |
| Chronic Heat 2 (CH&NDV) | Na <sup>+</sup> (mmol/L)   | 114.25 $\pm$ 1.45              | 127.00 $\pm$ 0.38              | 0.4517 | 0.8089   | 0.0807  |
|                         | K <sup>+</sup> (mmol/L)    | 3.35 $\pm$ 0.09                | 4.40 $\pm$ 0.02                | 0.277  | 0.2715   | 0.811   |
|                         | iCa <sup>2+</sup> (mmol/L) | 0.32 $\pm$ 0.05                | 0.89 $\pm$ 0.01                | 0.359  | 0.9265   | 0.5744  |
|                         | Glu (mg/dL)                | 235.90 $\pm$ 3.14 <sup>B</sup> | 237.75 $\pm$ 0.81 <sup>A</sup> | 0.0009 | 0.6531   | 0.1044  |
|                         | pH                         | 7.44 $\pm$ 0.01                | 7.44 $\pm$ 0.01                | 0.289  | 0.1823   | 0.7631  |
|                         | PCO <sub>2</sub> (mmHg)    | 33.16 $\pm$ 0.85               | 28.76 $\pm$ 0.22               | 0.9838 | 0.5579   | 0.5682  |
|                         | TCO <sub>2</sub> (mmol/L)  | 23.15 $\pm$ 0.41               | 20.17 $\pm$ 0.10               | 0.0973 | 0.0168   | 0.1272  |
|                         | HCO <sub>3</sub> (mmol/L)  | 22.18 $\pm$ 0.39               | 19.32 $\pm$ 0.10               | 0.0945 | 0.0116   | 0.1406  |
|                         | PO <sub>2</sub> (mmHg)     | 61.00 $\pm$ 1.30               | 55.90 $\pm$ 0.34               | 0.6984 | 0.0059   | 0.0159  |
|                         | sO <sub>2</sub> (%)        | 91.15 $\pm$ 0.74               | 89.33 $\pm$ 0.19               | 0.8616 | 0.6827   | 0.5621  |
|                         | BE (mmol/L)                | -1.94 $\pm$ 0.43               | -4.83 $\pm$ 0.11               | 0.0988 | 0.0064   | 0.1878  |

Note: Control: non-treated group; Treated: treated group; Trt: treatment effects; Sex: Sex effects; Trt\*Sex: interaction effects of treatment and sex; Different superscript letters within the row represent significant differences (P<0.05).
